# Supplementary material for: QM/MM studies on luminescence mechanism of dinuclear copper iodide complexes with thermally activated delayed fluorescence
Source: Royal Society of Chemistry journal article supplement (doi:10.1039/c9ra02256b), 2019-01-01
Supplement: c9ra02256b1.pdf [file c9ra02256b1.pdf]

**Supplementary Information:**

**QM/MM studies on luminescence mechanism of dinuclear copper iodide  
complexes with thermally activated delayed fluorescence**

Qian Wang,<sup>a</sup> Yuan-Jun Gao,<sup>a</sup> Ting-Ting Zhang,<sup>\*a,b</sup> Juan Han,<sup>\*a</sup> and Ganglong Cui<sup>a</sup>

<sup>a</sup>Key Laboratory of Theoretical and Computational Photochemistry, Ministry of Education,  
Chemistry College, Beijing Normal University, Beijing 100875, P. R. China

<sup>b</sup>Key Laboratory of Magnetic Molecules and Magnetic Information Materials of Ministry of  
Education, School of Chemistry and Materials Science, Shanxi Normal University, Linfen  
041000, P. R. China

E-mail: zhangtt@bnu.edu.cn and hanjuan@bnu.edu.cn

## Table of Contents

### 1 □ Additional Figures

**Figure S1.** ONIOM clusters of complexes **1** and **2** used in our present studies.

**Figure S2.** Frontier molecular orbitals and related orbital energies (in eV) at the  $T_1$  minimum of complexes **1** (left) and **2** (right) in crystal.

**Figure S3.** Frontier molecular orbitals and related orbital energies (in eV) at the  $S_0$  and  $S_1$  minima of complex **2** in crystal.

**Figure S4.** Selected molecular orbitals of complexes **1** and **2** at their  $S_0$  minima in crystal.

**Figure S5.** Calculated Huang-Rhys factors of each vibrational mode of complexes **1** and **2** in crystal.

### 2、 Additional Tables

**Table S1.** Selected Geometric Parameters of Complexes **1** and **2** in Crystal (Length in Å and Angles in °).

**Table S2.** Relative Energies (eV) of Optimized Structures for **1** and **2** in Crystal. (Ground State Energy as Reference).

**Table S3.** Calculated Vertical Excitation Energies (E/eV), Wavelength ( $\lambda$ /nm), Oscillator Strengths ( $f$ ), and Main Configurations, and State Assignments in Crystals.

**Table S4.** Temperature Dependence of Intersystem Crossing Rates and Reverse Intersystem Crossing Rates ( $s^{-1}$ ) (ISC from  $S_1$  to  $T_1$  and rISC from  $T_1$  to  $S_1$ ).

### 3、 Cartesian coordinates of optimized structures

## 1、Additional Figures

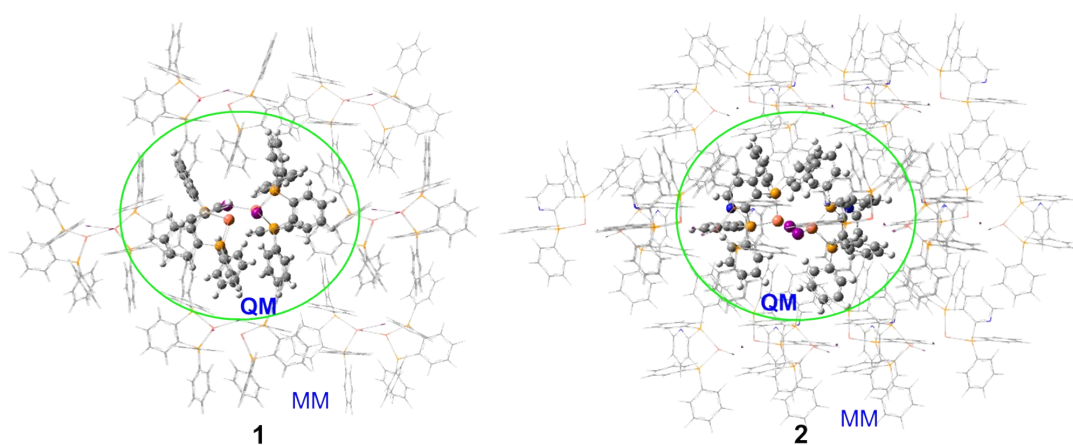

**Figure S1.** ONIOM clusters of complexes **1** and **2** used in our present studies. The central monomer is treated by quantum mechanics methods; while, the outer monomers are treated by molecular mechanics methods.

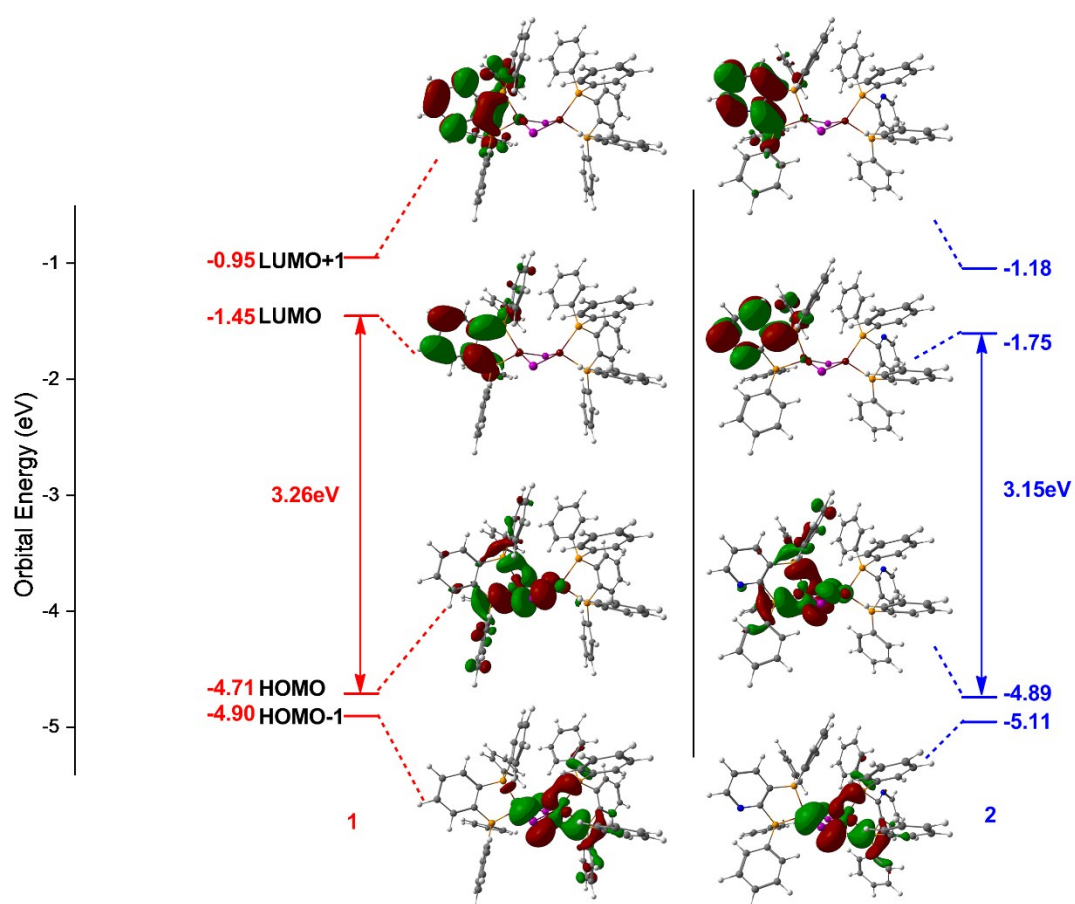

**Figure S2.** Frontier molecular orbitals and related orbital energies (in eV) at the  $T_1$  minimum of complexes **1** (left) and **2** (right) in crystal.

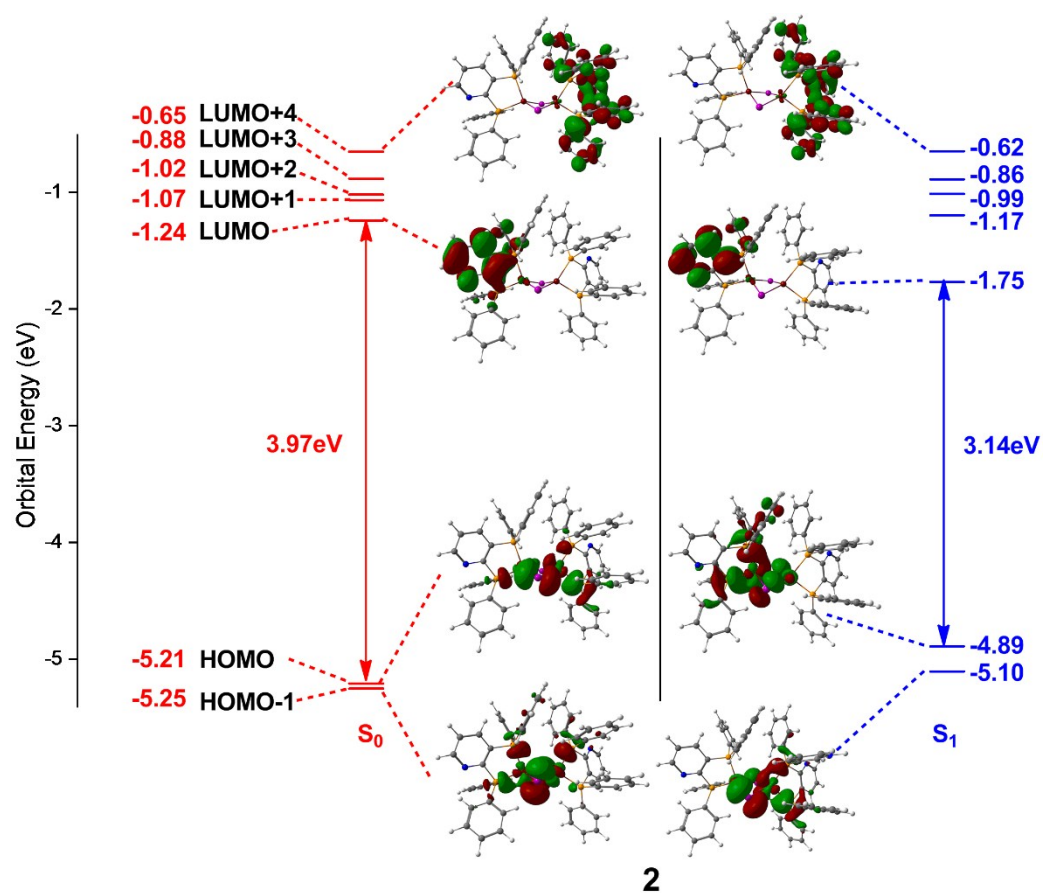

**Figure S3.** Frontier molecular orbitals and related orbital energies (in eV) at the  $S_0$  and  $S_1$  minima of complex **2** in crystal.

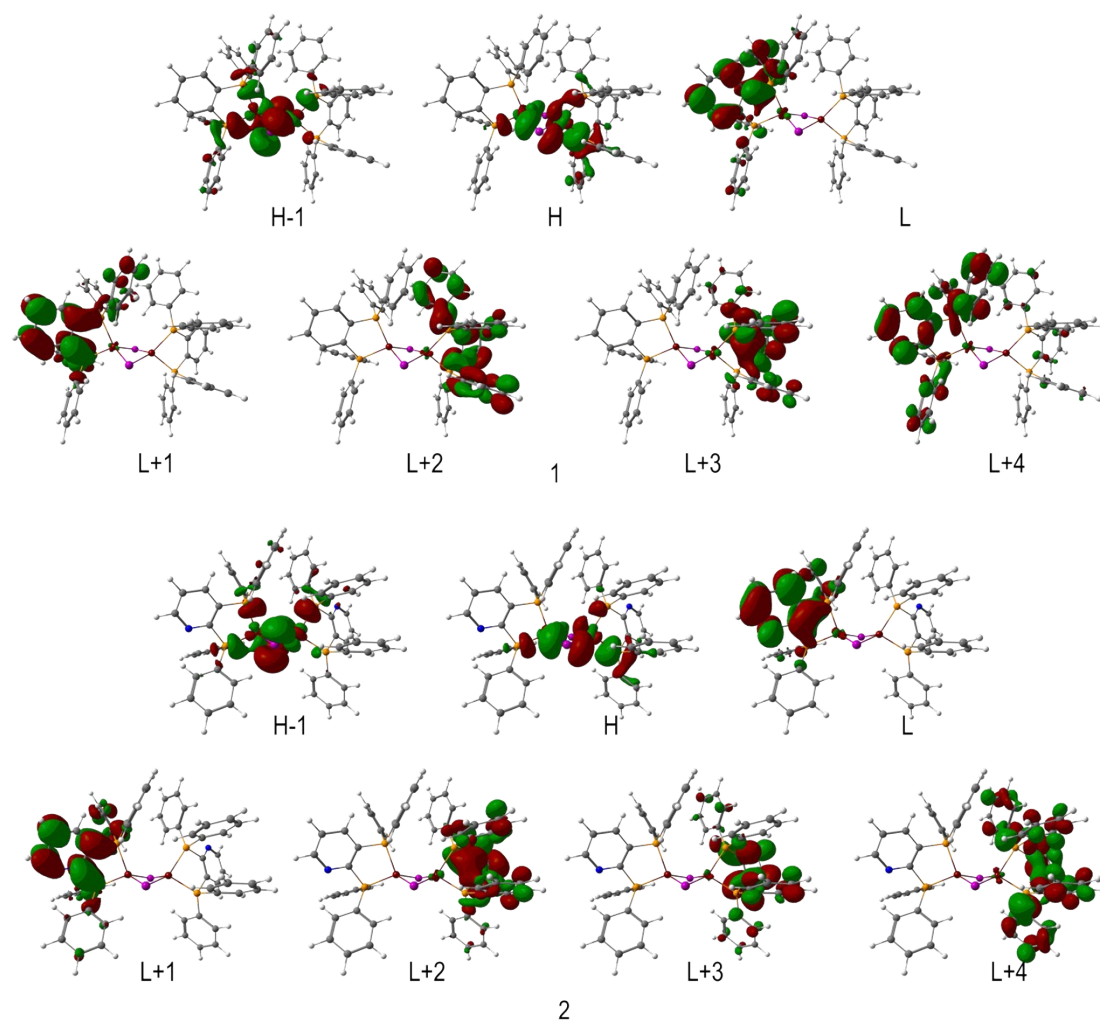

**Figure S4.** Selected molecular orbitals of complexes **1** and **2** at their  $S_0$  minima in crystal (ONIOM calculations).

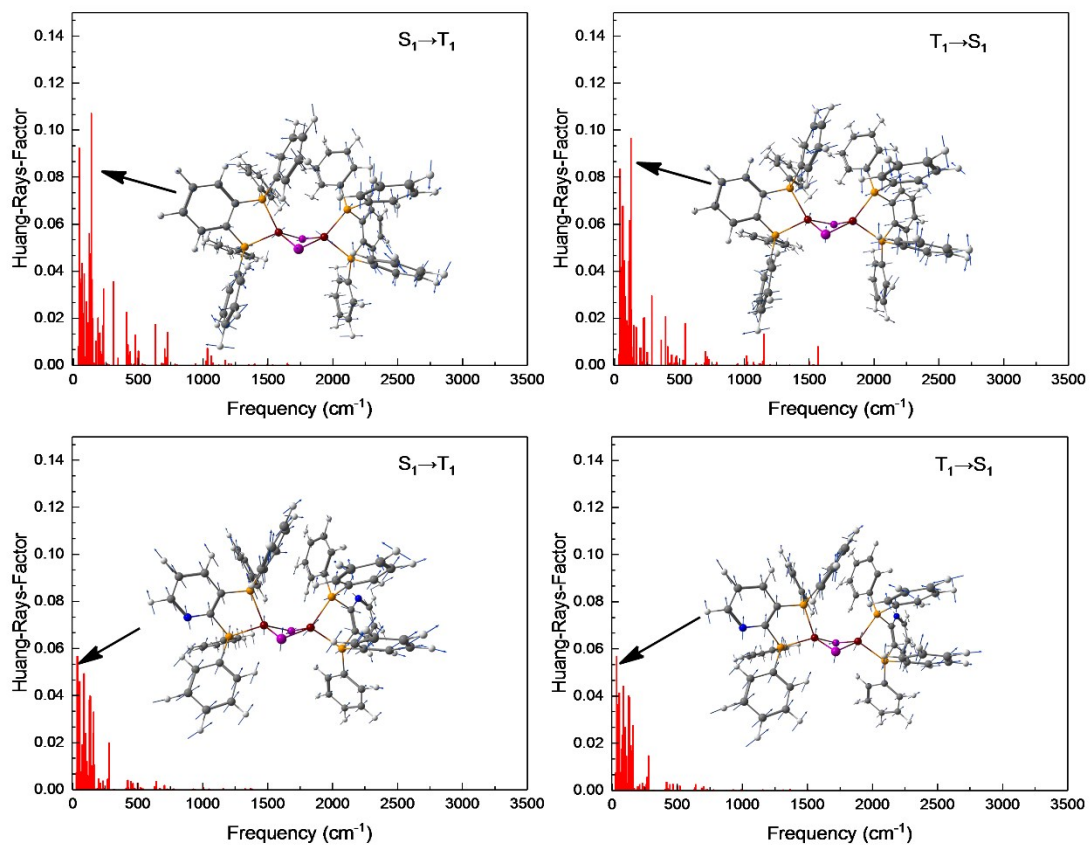

**Figure S5.** Calculated Huang-Rhys factors of each vibrational mode of complexes **1** and **2** in crystal.

## 2 □ Additional Tables

**Table S1.** Selected Geometric Parameters of Complexes **1** and **2** in Crystal (Length in Å and Angles in °).

| In Crystal                    |              |                |                |                |              |                |                |                |
|-------------------------------|--------------|----------------|----------------|----------------|--------------|----------------|----------------|----------------|
|                               | <b>1</b>     |                |                |                | <b>2</b>     |                |                |                |
|                               | EXP.(1)      | S <sub>0</sub> | S <sub>1</sub> | T <sub>1</sub> | EXP.(2)      | S <sub>0</sub> | S <sub>1</sub> | T <sub>1</sub> |
| <b>Distances</b>              |              |                |                |                |              |                |                |                |
| <b>Cu1-I1</b>                 | <b>2.570</b> | 2.616          | 2.607          | 2.610          | <b>2.670</b> | 2.713          | 2.698          | 2.704          |
| <b>Cu1-I2</b>                 | <b>2.649</b> | 2.695          | 2.683          | 2.686          | <b>2.601</b> | 2.638          | 2.623          | 2.625          |
| <b>Cu2-I1</b>                 | <b>2.679</b> | 2.728          | 2.685          | 2.684          | <b>2.627</b> | 2.691          | 2.664          | 2.662          |
| <b>Cu2-I2</b>                 | <b>2.626</b> | 2.677          | 2.673          | 2.675          | <b>2.645</b> | 2.716          | 2.685          | 2.690          |
| <b>Cu1-P1</b>                 | <b>2.263</b> | 2.286          | 2.281          | 2.281          | <b>2.295</b> | 2.314          | 2.303          | 2.302          |
| <b>Cu1-P2</b>                 | <b>2.274</b> | 2.298          | 2.304          | 2.3            | <b>2.285</b> | 2.325          | 2.327          | 2.323          |
| <b>Cu2-P3</b>                 | <b>2.273</b> | 2.308          | 2.303          | 2.317          | <b>2.270</b> | 2.305          | 2.310          | 2.311          |
| <b>Cu2-P4</b>                 | <b>2.277</b> | 2.302          | 2.329          | 2.326          | <b>2.272</b> | 2.291          | 2.295          | 2.299          |
| <b>Cu...Cu</b>                | <b>2.812</b> | 2.783          | 2.918          | 2.934          | <b>2.834</b> | 2.805          | 2.925          | 2.943          |
| <b>I...I</b>                  | <b>4.340</b> | 4.475          | 4.308          | 4.301          | <b>4.342</b> | 4.499          | 4.345          | 4.345          |
| <b>Bond Angles</b>            |              |                |                |                |              |                |                |                |
| <b>I-Cu-I<sup>a</sup></b>     | <b>111.0</b> | 113.3          | 108.0          | 107.7          | <b>111.0</b> | 113.5          | 109.0          | 108.9          |
| <b>Cu-I-Cu<sup>a</sup></b>    | <b>64.6</b>  | 62.6           | 66.0           | 66.8           | <b>65.1</b>  | 62.9           | 66.5           | 66.9           |
| <b>P-Cu-P<sup>a</sup></b>     | <b>88.0</b>  | 88.3           | 87.5           | 87.2           | <b>89.0</b>  | 90.0           | 88.2           | 88.2           |
| <b>Torsion Angles</b>         |              |                |                |                |              |                |                |                |
| <b>Cu-P-C-C<sup>a,b</sup></b> | <b>23.0</b>  | 22.3           | 22.7           | 22.8           | <b>20.0</b>  | 20.0           | 20.8           | 20.9           |
| <b>Cu-I-Cu-I<sup>a</sup></b>  | <b>22.1</b>  | 22.7           | 25.5           | 25.5           | <b>22.0</b>  | 21.4           | 23.2           | 22.5           |
| <b>Cu-I-I-Cu</b>              | <b>142.9</b> | 141.5          | 137.7          | 137.9          | <b>143.1</b> | 144.1          | 141.6          | 142.7          |

<sup>a</sup>Average values. <sup>b</sup>Torsion angle around the P-C axis in the five-membered ring CuP2C2

**Table S2.** Relative energy (eV) of PBE1PBE/6-31g\*(C/N/O/H)&6-31+G\*(P)&SDD(Cu/I) Optimized Structures for Complexes **1** and **2** in Crystal (Ground State Energy as Reference).

| In Crystal           |                   |                   |                   |                   |                   |                   |
|----------------------|-------------------|-------------------|-------------------|-------------------|-------------------|-------------------|
|                      | <b>1</b>          |                   |                   | <b>2</b>          |                   |                   |
|                      | At S <sub>0</sub> | At S <sub>1</sub> | At T <sub>1</sub> | At S <sub>0</sub> | At S <sub>1</sub> | At T <sub>1</sub> |
| <b>S<sub>1</sub></b> | 3.32              | 2.89              | 2.91              | 3.17              | 2.75              | 2.76              |
| <b>T<sub>1</sub></b> | 3.10              | 2.76              | 2.74              | 3.06              | 2.67              | 2.66              |
| <b>T<sub>2</sub></b> | 3.17              | 3.20              | 3.24              | 3.16              | 3.18              | 3.19              |

**Table S3.** Vertical Excitation Energy (E/eV), Wavelength ( $\lambda$ /nm), Oscillator Strength ( $f$ ) and Major Contribution of Calculated Transition for Complexes **1** and **2** in Crystal, Which were Computed by TD-PBE1PBE.

| In Crystal |           |        |                |        |                                      |            |
|------------|-----------|--------|----------------|--------|--------------------------------------|------------|
|            | State     | E (eV) | $\lambda$ (nm) | $f$    | Contribution                         | Assignment |
| <b>1</b>   | <b>1</b>  | 3.32   | 374            | 0.0226 | H-1-> L(50.7%)<br>H-> L(40.5%)       | (M+X)LCT   |
|            | <b>2</b>  | 3.37   | 367            | 0.0170 | H-1-> L+1(45.8%)<br>H-> L+1(41.1%)   | (M+X)LCT   |
|            | <b>3</b>  | 3.38   | 367            | 0.0153 | H-> L+2 (71.4%)                      | (M+X)LCT   |
|            | <b>4</b>  | 3.49   | 356            | 0.0061 | H-> L(33.8%)                         | (M+X)LCT   |
|            | <b>5</b>  | 3.52   | 353            | 0.0083 | H-> L+3 (54.1%)                      | (M+X)LCT   |
|            | <b>6</b>  | 3.59   | 345            | 0.0038 | H-1-> L+1(37.4%)<br>H-> L+1(51.9%)   | (M+X)LCT   |
|            | <b>7</b>  | 3.66   | 338            | 0.0090 | H-1-> L+2(74.3%)                     | (M+X)LCT   |
|            | <b>8</b>  | 3.74   | 331            | 0.0639 | H-> L+4(60.5%)<br>H-1-> L+4(23.9%)   | (M+X)LCT   |
|            | <b>9</b>  | 3.78   | 328            | 0.0101 | H-> L+5(29.4%)                       | (M+X)LCT   |
|            | <b>10</b> | 3.79   | 327            | 0.0219 | H-1-> L+3 (55.2%)                    | (M+X)LCT   |
|            | <b>11</b> | 3.82   | 325            | 0.0088 | H-2-> L(68.0%)                       | (M+X)LCT   |
|            | <b>26</b> | 4.25   | 291            | 0.0511 | H-> L+1(38.7%)                       | (M+X)LCT   |
| <b>2</b>   | <b>1</b>  | 3.17   | 392            | 0.0040 | H-1 -> L(57.6%)<br>H -> L(31.0%)     | (M+X)LCT   |
|            | <b>2</b>  | 3.32   | 374            | 0.0046 | H-1 -> L+1(42.7%)<br>H -> L+1(26.1%) | (M+X)LCT   |
|            | <b>3</b>  | 3.32   | 373            | 0.0070 | H -> L+2(59.0%)                      | (M+X)LCT   |
|            | <b>4</b>  | 3.36   | 369            | 0.0045 | H -> L(60.1%)                        | (M+X)LCT   |
|            | <b>5</b>  | 3.47   | 357            | 0.0173 | H -> L+3(75.3%)                      | (M+X)LCT   |
|            | <b>6</b>  | 3.52   | 352            | 0.0025 | H -> L+1 (47.0%)                     | (M+X)LCT   |
|            | <b>7</b>  | 3.52   | 352            | 0.0094 | H-1-> L+2(39.9%)<br>H -> L+2(24.2%)  | (M+X)LCT   |
|            | <b>8</b>  | 3.60   | 345            | 0.0046 | H-2 -> L(76.8%)                      | (M+X)LCT   |
|            | <b>9</b>  | 3.65   | 339            | 0.0088 | H-1-> L+3 (65.8%)<br>H -> L+3(20.5%) | (M+X)LCT   |
|            | <b>10</b> | 3.74   | 332            | 0.0470 | H -> L+4 (74.2%)                     | (M+X)LCT   |
|            | <b>11</b> | 3.77   | 329            | 0.0026 | H-2 -> L+1 (77.3%)                   | (M+X)LCT   |
|            | <b>28</b> | 4.26   | 291            | 0.0320 | H-1 -> L+7 (33.7%)                   | (M+X)LCT   |

Note:

(M+X)LCT: Metal-To-Ligand Charge Transfer Combined With The Halide-To-Ligand Charge-Transfer.



**Table S4.** Temperature Dependence of Intersystem Crossing Rates and Reverse Intersystem Crossing Rates ( $s^{-1}$ ) (ISC from  $S_1$  to  $T_1$  and rISC from  $T_1$  to  $S_1$ ).

|            | In Crystal         |                    |                    |                    |
|------------|--------------------|--------------------|--------------------|--------------------|
|            | 1                  |                    | 2                  |                    |
|            | $k_{ISC}$          | $k_{rISC}$         | $k_{ISC}$          | $k_{rISC}$         |
| <b>275</b> | $5.08 \times 10^8$ | $2.18 \times 10^5$ | $1.43 \times 10^9$ | $1.36 \times 10^7$ |
| <b>300</b> | $8.25 \times 10^8$ | $6.27 \times 10^5$ | $2.34 \times 10^9$ | $3.36 \times 10^7$ |
| <b>325</b> | $1.24 \times 10^9$ | $1.53 \times 10^6$ | $3.54 \times 10^9$ | $7.20 \times 10^7$ |
| <b>350</b> | $1.75 \times 10^9$ | $3.28 \times 10^6$ | $5.03 \times 10^9$ | $1.38 \times 10^8$ |
| <b>375</b> | $2.36 \times 10^9$ | $6.34 \times 10^6$ | $6.81 \times 10^9$ | $2.42 \times 10^8$ |

### 3、Cartesian coordinates of optimized structures

#### Crystal

##### $S_0(1)$

|    |             |             |             |
|----|-------------|-------------|-------------|
| I  | -0.04312900 | -0.91245600 | -2.17657900 |
| I  | 0.17686000  | -0.73856400 | 2.28932800  |
| Cu | -1.29399800 | -0.38328800 | 0.05956700  |
| Cu | 1.48701900  | -0.29692200 | -0.00335000 |
| P  | -2.63822900 | 1.45096200  | 0.29544300  |
| P  | -3.15156100 | -1.66281400 | 0.49715700  |
| P  | 3.45997500  | -1.40262100 | -0.46349100 |
| P  | 2.57757900  | 1.71215500  | -0.27197100 |
| C  | -3.69116400 | 1.88813600  | -1.13581000 |
| C  | -5.07829500 | 2.03895300  | -1.05626800 |
| C  | -5.80772100 | 2.40165300  | -2.18527700 |
| C  | -5.16150300 | 2.60543800  | -3.39987200 |
| C  | -3.78536900 | 2.40910600  | -3.49594000 |
| C  | -3.05107200 | 2.05669300  | -2.36977500 |
| C  | -2.10449600 | 3.08122100  | 0.93413700  |
| C  | -2.87538200 | 4.24612400  | 0.83699100  |
| C  | -2.39567900 | 5.44688300  | 1.35303300  |
| C  | -1.13090600 | 5.50415300  | 1.93323400  |
| C  | -0.34957600 | 4.35486700  | 2.00515500  |
| C  | -0.83882100 | 3.14646300  | 1.52182400  |
| C  | -4.02450500 | -0.56217500 | 1.68375700  |
| C  | -4.88597100 | -1.03967000 | 2.67391100  |
| C  | -5.55171700 | -0.15491700 | 3.51466100  |
| C  | -5.35949300 | 1.21131400  | 3.37759400  |
| C  | -4.49402700 | 1.70180100  | 2.41138200  |
| C  | -3.82148800 | 0.83015600  | 1.55567700  |
| C  | -4.36791200 | -1.74271500 | -0.86967600 |
| C  | -5.70474800 | -2.07162800 | -0.63054900 |
| C  | -6.64363400 | -1.97159500 | -1.64637600 |
| C  | -6.25374800 | -1.54611000 | -2.91767500 |
| C  | -4.91945300 | -1.25457400 | -3.17370200 |
| C  | -3.97791000 | -1.34800000 | -2.15081600 |
| C  | -3.18235500 | -3.32721100 | 1.24117700  |
| C  | -2.76002700 | -3.54789000 | 2.56018300  |
| C  | -2.64201300 | -4.84709500 | 3.04513600  |
| C  | -2.91707600 | -5.93830200 | 2.22650000  |
| C  | -3.32383400 | -5.72393800 | 0.91378800  |
| C  | -3.46128900 | -4.42949300 | 0.42619300  |

|   |             |             |             |
|---|-------------|-------------|-------------|
| C | 3.60175300  | -2.90626900 | -1.50026800 |
| C | 2.93925000  | -2.95445900 | -2.73392600 |
| C | 2.91029000  | -4.13266400 | -3.46812800 |
| C | 3.55194700  | -5.27584000 | -2.99816800 |
| C | 4.24057100  | -5.22948600 | -1.79159200 |
| C | 4.25475100  | -4.05290100 | -1.04516200 |
| C | 4.51343600  | -1.75124200 | 0.99492500  |
| C | 3.86996800  | -2.18452400 | 2.16158400  |
| C | 4.60576900  | -2.44042400 | 3.31563500  |
| C | 5.98689200  | -2.26588900 | 3.31566000  |
| C | 6.63517900  | -1.84837700 | 2.15484100  |
| C | 5.90290900  | -1.58981600 | 1.00058400  |
| C | 4.04301500  | 1.23330100  | -1.29816700 |
| C | 4.77774200  | 2.18417700  | -2.01531600 |
| C | 5.85357700  | 1.81078600  | -2.81518000 |
| C | 6.18822200  | 0.46614600  | -2.94278700 |
| C | 5.46497200  | -0.49303400 | -2.24279000 |
| C | 4.40416600  | -0.12849100 | -1.40382600 |
| C | 1.77922900  | 3.08732200  | -1.19247400 |
| C | 1.72130400  | 4.40641100  | -0.73183700 |
| C | 0.96112000  | 5.35812500  | -1.40748100 |
| C | 0.26420500  | 5.01606700  | -2.56095600 |
| C | 0.31558500  | 3.70513100  | -3.02984100 |
| C | 1.05017900  | 2.74669000  | -2.34137900 |
| C | 3.28566100  | 2.53173000  | 1.21220600  |
| C | 2.81265300  | 2.16025900  | 2.47578900  |
| C | 3.26863700  | 2.81110800  | 3.62181800  |
| C | 4.20248100  | 3.83539200  | 3.52121200  |
| C | 4.68960600  | 4.19842800  | 2.26916100  |
| C | 4.23619900  | 3.55403700  | 1.12483000  |
| H | -5.58830600 | 1.85294400  | -0.11623900 |
| H | -6.88472000 | 2.51862000  | -2.12090600 |
| H | -5.73273100 | 2.91117000  | -4.26864100 |
| H | -3.28177400 | 2.51814300  | -4.45271900 |
| H | -1.97888600 | 1.89271100  | -2.44514500 |
| H | -3.84402000 | 4.21428800  | 0.34382000  |
| H | -3.00483900 | 6.34401000  | 1.29335400  |
| H | -0.75228600 | 6.44913800  | 2.30984700  |
| H | 0.65565400  | 4.38392500  | 2.41434500  |
| H | -0.23233600 | 2.24653400  | 1.58475100  |
| H | -5.03132500 | -2.11015300 | 2.79343400  |
| H | -6.23486000 | -0.52235800 | 4.26948100  |

|   |             |             |             |
|---|-------------|-------------|-------------|
| H | -5.85238200 | 1.89426400  | 4.05169400  |
| H | -4.30923200 | 2.76914100  | 2.34554300  |
| H | -6.01150800 | -2.38985400 | 0.36065200  |
| H | -7.67511400 | -2.21905400 | -1.42253100 |
| H | -6.97992200 | -1.44742400 | -3.71892600 |
| H | -4.61192600 | -0.93119300 | -4.16440000 |
| H | -2.93898000 | -1.09499600 | -2.33951200 |
| H | -2.50698200 | -2.70756100 | 3.20109400  |
| H | -2.30906800 | -5.01707500 | 4.06380300  |
| H | -2.79491900 | -6.94514600 | 2.61274200  |
| H | -3.52913200 | -6.55800900 | 0.25343100  |
| H | -3.77773100 | -4.27023400 | -0.60006400 |
| H | 2.41818700  | -2.08061700 | -3.10620000 |
| H | 2.37624400  | -4.15922800 | -4.41018100 |
| H | 3.51738300  | -6.19414200 | -3.57592700 |
| H | 4.75877000  | -6.11088300 | -1.42388200 |
| H | 4.76922100  | -4.01387100 | -0.09367800 |
| H | 2.78889600  | -2.29866200 | 2.16875300  |
| H | 4.09736900  | -2.76235000 | 4.22041500  |
| H | 6.55220300  | -2.46274000 | 4.21903500  |
| H | 7.71296700  | -1.71557100 | 2.14166100  |
| H | 6.41695500  | -1.25615100 | 0.10316600  |
| H | 4.46465600  | 3.22333800  | -1.98797900 |
| H | 6.40374900  | 2.56149500  | -3.37443800 |
| H | 7.00144000  | 0.16237900  | -3.59592800 |
| H | 5.71146600  | -1.54537900 | -2.36189400 |
| H | 2.24368300  | 4.69671500  | 0.17353300  |
| H | 0.90563800  | 6.36867300  | -1.01674900 |
| H | -0.32995400 | 5.76001600  | -3.08187800 |
| H | -0.23505600 | 3.42087200  | -3.92333300 |
| H | 1.03109000  | 1.71571000  | -2.67998500 |
| H | 2.08306600  | 1.35945200  | 2.56334800  |
| H | 2.88798700  | 2.52136900  | 4.59553600  |
| H | 4.54565500  | 4.34641100  | 4.41694400  |
| H | 5.43544300  | 4.97551700  | 2.16985500  |
| H | 4.62800100  | 3.85468700  | 0.15841700  |

**S<sub>1</sub>(1)**

|    |             |             |             |
|----|-------------|-------------|-------------|
| I  | 0.01978400  | -1.09816600 | -2.03706500 |
| I  | 0.21184100  | -0.66408100 | 2.24432600  |
| Cu | -1.32413900 | -0.34916300 | 0.06724000  |
| Cu | 1.59178000  | -0.29423700 | -0.01475500 |

|   |             |             |             |
|---|-------------|-------------|-------------|
| P | -2.67669300 | 1.47762600  | 0.25567800  |
| P | -3.17573400 | -1.64217300 | 0.52150100  |
| P | 3.57532200  | -1.35069500 | -0.51971600 |
| P | 2.70872600  | 1.72617200  | -0.32512000 |
| C | -3.71916200 | 1.86631700  | -1.19566100 |
| C | -5.10776800 | 2.00861300  | -1.12986300 |
| C | -5.83055100 | 2.33805700  | -2.27318400 |
| C | -5.17601200 | 2.51708600  | -3.48714900 |
| C | -3.79775200 | 2.32892300  | -3.56814100 |
| C | -3.07026200 | 2.00945500  | -2.42795600 |
| C | -2.15754000 | 3.12095300  | 0.86551900  |
| C | -2.93756800 | 4.27693600  | 0.73735700  |
| C | -2.47336200 | 5.49051900  | 1.23644400  |
| C | -1.21597300 | 5.56898800  | 1.83057800  |
| C | -0.42564700 | 4.42865600  | 1.93250700  |
| C | -0.89950700 | 3.20816200  | 1.46556500  |
| C | -4.06297700 | -0.52094800 | 1.67501700  |
| C | -4.93237800 | -0.98251200 | 2.66602400  |
| C | -5.61142600 | -0.08391100 | 3.48082800  |
| C | -5.42384500 | 1.28000700  | 3.31648900  |
| C | -4.55026500 | 1.75497000  | 2.34973300  |
| C | -3.86445100 | 0.86941900  | 1.51912400  |
| C | -4.37167100 | -1.75859500 | -0.85911800 |
| C | -5.70841000 | -2.09293800 | -0.62645000 |
| C | -6.63729600 | -2.02254700 | -1.65381500 |
| C | -6.23749400 | -1.62190500 | -2.92994000 |
| C | -4.90291800 | -1.32488800 | -3.17895300 |
| C | -3.97165400 | -1.38811100 | -2.14447700 |
| C | -3.19873700 | -3.29105900 | 1.29844300  |
| C | -2.78980900 | -3.48076100 | 2.62652400  |
| C | -2.67087200 | -4.76852300 | 3.14094900  |
| C | -2.93189000 | -5.87850400 | 2.34309900  |
| C | -3.32569400 | -5.69501600 | 1.02184500  |
| C | -3.46380500 | -4.41212000 | 0.50440900  |
| C | 3.56827400  | -2.92259800 | -1.44148700 |
| C | 2.96377900  | -3.00609500 | -2.70148500 |
| C | 2.94342400  | -4.21099400 | -3.38632300 |
| C | 3.55211100  | -5.34335500 | -2.84808100 |
| C | 4.19380800  | -5.26017800 | -1.61905500 |
| C | 4.18837700  | -4.05835600 | -0.91403400 |
| C | 4.51185900  | -1.72223700 | 1.01546500  |
| C | 3.84390700  | -2.18255300 | 2.15712100  |

|   |             |             |             |
|---|-------------|-------------|-------------|
| C | 4.54584900  | -2.39133500 | 3.34115900  |
| C | 5.91878500  | -2.15999400 | 3.38989000  |
| C | 6.59174100  | -1.72828000 | 2.24828900  |
| C | 5.89030700  | -1.49358800 | 1.06999800  |
| C | 4.07641000  | 1.25962300  | -1.34761900 |
| C | 4.88733000  | 2.20866500  | -2.02696400 |
| C | 5.96678700  | 1.83412600  | -2.79041600 |
| C | 6.31005300  | 0.45731900  | -2.93381200 |
| C | 5.55475700  | -0.49438500 | -2.27186200 |
| C | 4.44476800  | -0.14357500 | -1.48815900 |
| C | 1.68862300  | 2.97753000  | -1.21000400 |
| C | 1.59822400  | 4.30748600  | -0.78134500 |
| C | 0.85145200  | 5.23739600  | -1.50263700 |
| C | 0.18410100  | 4.85862200  | -2.66129800 |
| C | 0.25921900  | 3.53397400  | -3.09311900 |
| C | 0.99611300  | 2.60364700  | -2.37059900 |
| C | 3.25958700  | 2.63492100  | 1.17468400  |
| C | 2.77585400  | 2.27365900  | 2.43949500  |
| C | 3.20559200  | 2.94321000  | 3.58383900  |
| C | 4.13055300  | 3.97684100  | 3.48636400  |
| C | 4.63027700  | 4.32714900  | 2.23467800  |
| C | 4.20125500  | 3.66798500  | 1.09101100  |
| H | -5.62388300 | 1.84310200  | -0.18941900 |
| H | -6.90865900 | 2.44927700  | -2.22016000 |
| H | -5.74235000 | 2.79895000  | -4.36692200 |
| H | -3.28701100 | 2.42166300  | -4.52271400 |
| H | -1.99493900 | 1.86142600  | -2.48966100 |
| H | -3.89979700 | 4.22802000  | 0.23324300  |
| H | -3.08824600 | 6.38148400  | 1.15144500  |
| H | -0.84885200 | 6.52382000  | 2.19281200  |
| H | 0.57609800  | 4.47177800  | 2.34829100  |
| H | -0.28044100 | 2.31947100  | 1.54916900  |
| H | -5.07394200 | -2.05099400 | 2.80614400  |
| H | -6.29998000 | -0.43903800 | 4.23673500  |
| H | -5.92690700 | 1.97472900  | 3.97036700  |
| H | -4.36989900 | 2.82160200  | 2.26389600  |
| H | -6.02353900 | -2.39184500 | 0.36818000  |
| H | -7.66910100 | -2.27311200 | -1.43517800 |
| H | -6.95651300 | -1.54670600 | -3.74006800 |
| H | -4.58841100 | -1.02068600 | -4.17341200 |
| H | -2.93339200 | -1.12929000 | -2.32824400 |
| H | -2.55275700 | -2.62544800 | 3.25383400  |

|   |             |             |             |
|---|-------------|-------------|-------------|
| H | -2.34984700 | -4.91513700 | 4.16691700  |
| H | -2.80997700 | -6.87620400 | 2.75243500  |
| H | -3.52134200 | -6.54493000 | 0.37885500  |
| H | -3.77185100 | -4.27724700 | -0.52785200 |
| H | 2.50527300  | -2.13041500 | -3.14256700 |
| H | 2.46149200  | -4.26455600 | -4.35343900 |
| H | 3.53698600  | -6.27857300 | -3.39794400 |
| H | 4.69460500  | -6.13034100 | -1.20437100 |
| H | 4.67975600  | -3.98507100 | 0.04742000  |
| H | 2.77219500  | -2.35924100 | 2.12541200  |
| H | 4.01838000  | -2.72677400 | 4.23003500  |
| H | 6.45900700  | -2.32439100 | 4.31564500  |
| H | 7.66446500  | -1.56004700 | 2.27057500  |
| H | 6.41042400  | -1.12887600 | 0.18798400  |
| H | 4.59102600  | 3.25260300  | -1.99838100 |
| H | 6.53190700  | 2.58348300  | -3.33572000 |
| H | 7.12575800  | 0.15712400  | -3.58112600 |
| H | 5.80204900  | -1.54831300 | -2.39192600 |
| H | 2.10417600  | 4.62697400  | 0.12281700  |
| H | 0.78975000  | 6.26128100  | -1.14702900 |
| H | -0.39485000 | 5.58623900  | -3.22171200 |
| H | -0.26025800 | 3.22339800  | -3.99671600 |
| H | 1.03032200  | 1.57383100  | -2.70618600 |
| H | 2.05909800  | 1.46388800  | 2.53226000  |
| H | 2.81307000  | 2.65964300  | 4.55526700  |
| H | 4.45867500  | 4.49996200  | 4.38062500  |
| H | 5.37278900  | 5.10588200  | 2.13459300  |
| H | 4.60850900  | 3.95522400  | 0.12712400  |

**T<sub>1</sub>(1)**

|    |             |             |             |
|----|-------------|-------------|-------------|
| I  | 0.02820900  | -1.09348800 | -2.03865500 |
| I  | 0.21116500  | -0.66922300 | 2.23712900  |
| Cu | -1.33274500 | -0.35458000 | 0.06195800  |
| Cu | 1.59965200  | -0.28823700 | -0.01778200 |
| P  | -2.67881800 | 1.47666600  | 0.25188400  |
| P  | -3.18511600 | -1.64053000 | 0.51591700  |
| P  | 3.59824100  | -1.34214200 | -0.52928500 |
| P  | 2.72794000  | 1.72265500  | -0.32346900 |
| C  | -3.71866200 | 1.87093900  | -1.20011900 |
| C  | -5.10662800 | 2.01992900  | -1.13554000 |
| C  | -5.82677800 | 2.35431200  | -2.27910900 |
| C  | -5.17018500 | 2.53221700  | -3.49214600 |

|   |             |             |             |
|---|-------------|-------------|-------------|
| C | -3.79277100 | 2.33742200  | -3.57211200 |
| C | -3.06801600 | 2.01230300  | -2.43174900 |
| C | -2.15760700 | 3.11955100  | 0.86353000  |
| C | -2.93597600 | 4.27684200  | 0.73682400  |
| C | -2.47071000 | 5.48919500  | 1.23810600  |
| C | -1.21355200 | 5.56541600  | 1.83291300  |
| C | -0.42467500 | 4.42390700  | 1.93343300  |
| C | -0.89973600 | 3.20453100  | 1.46447400  |
| C | -4.07177000 | -0.51813400 | 1.66910600  |
| C | -4.94331900 | -0.97797900 | 2.65903500  |
| C | -5.62146200 | -0.07815400 | 3.47332100  |
| C | -5.43096700 | 1.28545000  | 3.30943100  |
| C | -4.55512000 | 1.75867100  | 2.34382400  |
| C | -3.87002800 | 0.87186500  | 1.51389300  |
| C | -4.37953200 | -1.75295700 | -0.86618300 |
| C | -5.71761500 | -2.08354600 | -0.63627100 |
| C | -6.64454300 | -2.00871700 | -1.66506800 |
| C | -6.24132100 | -1.60718500 | -2.93984700 |
| C | -4.90532300 | -1.31416600 | -3.18620800 |
| C | -3.97590800 | -1.38204000 | -2.15032000 |
| C | -3.21296600 | -3.28977200 | 1.29185800  |
| C | -2.80525900 | -3.48143500 | 2.61999500  |
| C | -2.68887700 | -4.76990300 | 3.13322300  |
| C | -2.95111500 | -5.87867100 | 2.33407200  |
| C | -3.34355300 | -5.69315500 | 1.01270600  |
| C | -3.47929800 | -4.40953500 | 0.49655000  |
| C | 3.58466600  | -2.92057300 | -1.43711600 |
| C | 2.98558500  | -2.99547100 | -2.70027900 |
| C | 2.95279400  | -4.19972500 | -3.38645600 |
| C | 3.54483300  | -5.33883600 | -2.84454800 |
| C | 4.18063800  | -5.26519600 | -1.61105000 |
| C | 4.18497500  | -4.06445900 | -0.90501300 |
| C | 4.49109600  | -1.72751100 | 1.03492300  |
| C | 3.81741500  | -2.18698900 | 2.17286600  |
| C | 4.51543700  | -2.40001300 | 3.35874500  |
| C | 5.88946000  | -2.17459500 | 3.41248100  |
| C | 6.56818400  | -1.74332700 | 2.27404400  |
| C | 5.87076600  | -1.50308700 | 1.09475600  |
| C | 4.11986800  | 1.26454200  | -1.32965700 |
| C | 4.91401200  | 2.20550400  | -2.01321800 |
| C | 5.98202900  | 1.83491900  | -2.80394700 |
| C | 6.28573400  | 0.44755500  | -2.97909300 |



|   |             |             |             |
|---|-------------|-------------|-------------|
| C | 5.52962200  | -0.50376400 | -2.34207900 |
| C | 4.44009100  | -0.15224900 | -1.50002200 |
| C | 1.72303900  | 2.98973800  | -1.19633800 |
| C | 1.64292400  | 4.32079000  | -0.76781800 |
| C | 0.89151600  | 5.25199200  | -1.48183200 |
| C | 0.21101100  | 4.87492500  | -2.63387400 |
| C | 0.27639700  | 3.54965400  | -3.06540100 |
| C | 1.01521300  | 2.61655300  | -2.34886300 |
| C | 3.27925000  | 2.60131100  | 1.19435000  |
| C | 2.76876500  | 2.24539400  | 2.44775100  |
| C | 3.17664500  | 2.91968100  | 3.59815600  |
| C | 4.10100500  | 3.95392400  | 3.51383200  |
| C | 4.62317900  | 4.30283100  | 2.27152200  |
| C | 4.21761600  | 3.63597900  | 1.12306100  |
| H | -5.62440500 | 1.85573000  | -0.19574900 |
| H | -6.90440100 | 2.47079400  | -2.22690000 |
| H | -5.73429000 | 2.81816500  | -4.37207100 |
| H | -3.28080800 | 2.42929300  | -4.52613300 |
| H | -1.99360800 | 1.85718500  | -2.49275100 |
| H | -3.89816200 | 4.22997700  | 0.23241300  |
| H | -3.08474200 | 6.38092600  | 1.15473000  |
| H | -0.84573600 | 6.51925700  | 2.19717100  |
| H | 0.57642200  | 4.46586100  | 2.35103400  |
| H | -0.28284600 | 2.31422800  | 1.54796500  |
| H | -5.08726600 | -2.04620200 | 2.79875100  |
| H | -6.31145300 | -0.43210700 | 4.22851400  |
| H | -5.93352100 | 1.98129900  | 3.96264400  |
| H | -4.37259700 | 2.82497600  | 2.25849100  |
| H | -6.03526600 | -2.38289700 | 0.35742100  |
| H | -7.67743700 | -2.25654500 | -1.44848200 |
| H | -6.95882700 | -1.52830100 | -3.75099100 |
| H | -4.58822200 | -1.00961700 | -4.17974300 |
| H | -2.93625900 | -1.12653100 | -2.33164000 |
| H | -2.56669900 | -2.62713400 | 3.24814600  |
| H | -2.36873000 | -4.91811800 | 4.15923400  |
| H | -2.83100900 | -6.87696500 | 2.74249900  |
| H | -3.53978000 | -6.54187900 | 0.36839200  |
| H | -3.78598500 | -4.27306100 | -0.53590400 |
| H | 2.53904300  | -2.11246800 | -3.13919400 |
| H | 2.47409200  | -4.24829500 | -4.35567200 |
| H | 3.52081900  | -6.27400700 | -3.39442500 |
| H | 4.66836600  | -6.14246500 | -1.19587700 |

|   |             |             |             |
|---|-------------|-------------|-------------|
| H | 4.67032700  | -3.99519900 | 0.05971300  |
| H | 2.74564200  | -2.36221600 | 2.13710000  |
| H | 3.98461200  | -2.73644000 | 4.24534500  |
| H | 6.42667100  | -2.34376900 | 4.33910400  |
| H | 7.64181300  | -1.58146900 | 2.29915200  |
| H | 6.39429200  | -1.14155000 | 0.21314900  |
| H | 4.63118200  | 3.25213600  | -1.95794000 |
| H | 6.55484400  | 2.58270000  | -3.34103000 |
| H | 7.09234000  | 0.14697100  | -3.63833700 |
| H | 5.75310100  | -1.55768700 | -2.49854400 |
| H | 2.15833100  | 4.63974600  | 0.13140700  |
| H | 0.83498300  | 6.27592100  | -1.12577800 |
| H | -0.37167900 | 5.60408500  | -3.18842600 |
| H | -0.25296800 | 3.24050200  | -3.96364000 |
| H | 1.03838300  | 1.58533100  | -2.68179000 |
| H | 2.05075400  | 1.43556400  | 2.52920900  |
| H | 2.76855900  | 2.63751900  | 4.56322700  |
| H | 4.41154200  | 4.47985700  | 4.41281600  |
| H | 5.36526200  | 5.08363000  | 2.18325100  |
| H | 4.64152300  | 3.91874000  | 0.16518900  |

**S<sub>0</sub> (2)**

|    |             |             |             |
|----|-------------|-------------|-------------|
| I  | 0.15492900  | -0.91660700 | 2.33043100  |
| I  | 0.05715400  | -1.01732700 | -2.16615100 |
| Cu | -1.27624600 | -0.53307200 | 0.05763800  |
| Cu | 1.52855600  | -0.49291500 | 0.05541400  |
| P  | -2.49355700 | 1.38601900  | 0.49204500  |
| P  | -3.25002700 | -1.74663100 | 0.24411100  |
| P  | 3.63803400  | -1.33358500 | -0.33930000 |
| P  | 2.23168200  | 1.65282000  | -0.33067800 |
| N  | -4.25448700 | 1.43057900  | 2.58925000  |
| N  | 5.68727500  | -0.09155500 | -1.69569500 |
| C  | -1.95971800 | 2.91311300  | 1.35536500  |
| C  | -2.36599600 | 4.18983700  | 0.95399900  |
| C  | -1.84620600 | 5.32033100  | 1.58194700  |
| C  | -0.93091400 | 5.19007200  | 2.62300800  |
| C  | -0.53436200 | 3.92077100  | 3.03810100  |
| C  | -1.03877600 | 2.78977200  | 2.40348600  |
| C  | -3.44833100 | 1.99635900  | -0.94166300 |
| C  | -4.80693500 | 2.31638100  | -0.88504600 |
| C  | -5.47540000 | 2.77207200  | -2.01714600 |
| C  | -4.79410600 | 2.89394100  | -3.22558700 |

|   |             |             |             |
|---|-------------|-------------|-------------|
| C | -3.44447700 | 2.55820400  | -3.29197100 |
| C | -2.76829800 | 2.12193000  | -2.15793500 |
| C | -4.05792800 | -0.72847700 | 1.53824400  |
| C | -4.95204900 | -1.26098500 | 2.46386300  |
| C | -5.48746500 | -0.44101800 | 3.44516100  |
| C | -5.09326500 | 0.88998600  | 3.47007100  |
| C | -3.74653600 | 0.64589400  | 1.63940800  |
| C | -4.40842200 | -1.51044000 | -1.15231900 |
| C | -5.80421600 | -1.54316400 | -1.03349700 |
| C | -6.61029400 | -1.17492200 | -2.10591500 |
| C | -6.02919000 | -0.71881100 | -3.28833200 |
| C | -4.64580700 | -0.67214000 | -3.40586000 |
| C | -3.83960800 | -1.09499200 | -2.35738600 |
| C | -3.46114900 | -3.46116000 | 0.85172900  |
| C | -4.56308700 | -4.27257600 | 0.55670500  |
| C | -4.64981000 | -5.55483300 | 1.09324100  |
| C | -3.63917000 | -6.04443300 | 1.91757400  |
| C | -2.52841300 | -5.25245900 | 2.19588500  |
| C | -2.43793000 | -3.96946800 | 1.66288100  |
| C | 4.71452900  | -1.70414400 | 1.10201900  |
| C | 4.12218500  | -1.66183800 | 2.36968000  |
| C | 4.87116200  | -1.94798600 | 3.50885300  |
| C | 6.21367500  | -2.28700900 | 3.38912400  |
| C | 6.80793600  | -2.34790400 | 2.13058400  |
| C | 6.06617100  | -2.05385200 | 0.98984100  |
| C | 3.86255800  | -2.75193000 | -1.49272200 |
| C | 2.72942400  | -3.55442100 | -1.67551700 |
| C | 2.76736500  | -4.68902600 | -2.48112500 |
| C | 3.94487900  | -5.02820900 | -3.13612200 |
| C | 5.06973200  | -4.21819500 | -2.99297800 |
| C | 5.03892200  | -3.08888200 | -2.17791700 |
| C | 3.82771200  | 1.37057700  | -1.22867700 |
| C | 4.45934500  | 2.38323900  | -1.96427700 |
| C | 5.69388800  | 2.14729600  | -2.54958700 |
| C | 6.27384100  | 0.89502100  | -2.36930700 |
| C | 4.48104800  | 0.12022500  | -1.15417300 |
| C | 2.85278800  | 2.64540700  | 1.07630600  |
| C | 2.71881200  | 2.18952600  | 2.38967700  |
| C | 3.26680000  | 2.92560400  | 3.44126900  |
| C | 3.95309600  | 4.10239900  | 3.17860500  |
| C | 4.05546600  | 4.57528400  | 1.87665400  |
| C | 3.50891000  | 3.85377800  | 0.83255900  |

|   |             |             |             |
|---|-------------|-------------|-------------|
| C | 1.35892600  | 2.91286400  | -1.34347200 |
| C | 0.84833400  | 4.07789600  | -0.75676400 |
| C | 0.15632500  | 5.01182200  | -1.52231000 |
| C | -0.04601500 | 4.79576300  | -2.88087000 |
| C | 0.40509800  | 3.61376200  | -3.46316500 |
| C | 1.09382900  | 2.67597600  | -2.70013800 |
| H | -3.07527400 | 4.30593100  | 0.13962200  |
| H | -2.14603700 | 6.30852700  | 1.24569000  |
| H | -0.51873900 | 6.07070200  | 3.10504300  |
| H | 0.18381700  | 3.81105500  | 3.84655400  |
| H | -0.70540400 | 1.80311400  | 2.71224000  |
| H | -5.34536500 | 2.19858700  | 0.04686600  |
| H | -6.53047800 | 3.01597800  | -1.94942300 |
| H | -5.31332900 | 3.22772600  | -4.11936000 |
| H | -2.91747100 | 2.60214200  | -4.23960500 |
| H | -1.71729900 | 1.85066100  | -2.22069200 |
| H | -5.19709800 | -2.31889700 | 2.42800700  |
| H | -6.18767600 | -0.82380400 | 4.17826600  |
| H | -5.46003100 | 1.55788400  | 4.23736600  |
| H | -6.26703400 | -1.82199900 | -0.09144700 |
| H | -7.69143700 | -1.21586000 | -2.00335300 |
| H | -6.64129400 | -0.37041800 | -4.11237800 |
| H | -4.17681900 | -0.26546400 | -4.29483200 |
| H | -2.75914600 | -1.05059200 | -2.45340400 |
| H | -5.34678700 | -3.92049000 | -0.10731700 |
| H | -5.50484500 | -6.17209000 | 0.84685900  |
| H | -3.71028800 | -7.04030600 | 2.34159900  |
| H | -1.72969000 | -5.63444100 | 2.82529400  |
| H | -1.57068600 | -3.35094900 | 1.87887200  |
| H | 3.06689200  | -1.41711300 | 2.46016800  |
| H | 4.40281800  | -1.92056100 | 4.48878900  |
| H | 6.79430500  | -2.51571300 | 4.27472100  |
| H | 7.84736200  | -2.64696600 | 2.04277700  |
| H | 6.53584200  | -2.09545500 | 0.01351300  |
| H | 1.79194600  | -3.24563500 | -1.23542800 |
| H | 1.87006100  | -5.28846700 | -2.60984400 |
| H | 3.98229400  | -5.90651000 | -3.77392600 |
| H | 5.97425000  | -4.46586500 | -3.53834500 |
| H | 5.90934900  | -2.44615300 | -2.10678500 |
| H | 3.96683100  | 3.34125200  | -2.10804100 |
| H | 6.19044300  | 2.90698300  | -3.14474500 |
| H | 7.24288800  | 0.66689400  | -2.80786600 |

|   |             |            |             |
|---|-------------|------------|-------------|
| H | 2.18653500  | 1.26226300 | 2.58545200  |
| H | 3.16256800  | 2.58696500 | 4.46526900  |
| H | 4.45253000  | 4.64380900 | 3.97235900  |
| H | 4.59079000  | 5.48632500 | 1.66738900  |
| H | 3.59495000  | 4.23248500 | -0.17895300 |
| H | 0.97949500  | 4.26546700 | 0.30414900  |
| H | -0.22855400 | 5.90483900 | -1.04137600 |
| H | -0.56634500 | 5.53893100 | -3.47655100 |
| H | 0.21447600  | 3.41214500 | -4.51274000 |
| H | 1.39448000  | 1.74172700 | -3.15768500 |

**S<sub>1</sub>(2)**

|    |             |             |             |
|----|-------------|-------------|-------------|
| I  | 0.18538000  | -0.90599100 | 2.24408500  |
| I  | 0.05125900  | -1.09207300 | -2.09472800 |
| Cu | -1.33467400 | -0.50009600 | 0.05209400  |
| Cu | 1.58979500  | -0.48197000 | 0.02003300  |
| P  | -2.52837800 | 1.41962200  | 0.49227600  |
| P  | -3.30613100 | -1.71944600 | 0.25210100  |
| P  | 3.72859800  | -1.26149900 | -0.37396000 |
| P  | 2.39421200  | 1.63102200  | -0.37371800 |
| N  | -4.29439700 | 1.47556500  | 2.58021900  |
| N  | 5.78864000  | -0.10116100 | -1.65326700 |
| C  | -1.97934300 | 2.93849800  | 1.35520600  |
| C  | -2.37614400 | 4.21708200  | 0.95098100  |
| C  | -1.83744000 | 5.34402700  | 1.56867500  |
| C  | -0.91315000 | 5.20828200  | 2.60108300  |
| C  | -0.52801900 | 3.93730800  | 3.02104200  |
| C  | -1.05226500 | 2.80979100  | 2.39689200  |
| C  | -3.45999100 | 2.02081900  | -0.95809800 |
| C  | -4.81882400 | 2.34161200  | -0.92094500 |
| C  | -5.47377800 | 2.78161900  | -2.06686400 |
| C  | -4.77898300 | 2.88492600  | -3.26922500 |
| C  | -3.42832200 | 2.54947900  | -3.31541100 |
| C  | -2.76491800 | 2.13145000  | -2.16727000 |
| C  | -4.11009200 | -0.68768800 | 1.53635800  |
| C  | -5.00945900 | -1.21164300 | 2.46209100  |
| C  | -5.54271700 | -0.38477100 | 3.43819300  |
| C  | -5.13884400 | 0.94354000  | 3.46044400  |
| C  | -3.79041700 | 0.68514700  | 1.63323000  |
| C  | -4.44779300 | -1.48875100 | -1.15625600 |
| C  | -5.84453400 | -1.51512100 | -1.04984200 |
| C  | -6.63845800 | -1.15341400 | -2.13335400 |

|   |             |             |             |
|---|-------------|-------------|-------------|
| C | -6.04415900 | -0.71065800 | -3.31424400 |
| C | -4.65957000 | -0.67010400 | -3.41958000 |
| C | -3.86569400 | -1.08608700 | -2.35940500 |
| C | -3.52184500 | -3.42783900 | 0.87277200  |
| C | -4.62656500 | -4.23722400 | 0.58264500  |
| C | -4.72070900 | -5.51316700 | 1.13275300  |
| C | -3.71501300 | -5.99858000 | 1.96566100  |
| C | -2.60142600 | -5.20892500 | 2.23935800  |
| C | -2.50386200 | -3.93219300 | 1.69285700  |
| C | 4.69566600  | -1.67837100 | 1.12150200  |
| C | 4.09537700  | -1.60230600 | 2.38218400  |
| C | 4.82215300  | -1.91814000 | 3.52750700  |
| C | 6.15071000  | -2.31209400 | 3.42036900  |
| C | 6.75287300  | -2.39899900 | 2.16741500  |
| C | 6.03288600  | -2.08526700 | 1.01841600  |
| C | 3.85899700  | -2.73605200 | -1.45991900 |
| C | 2.74377200  | -3.57220900 | -1.57356100 |
| C | 2.78607800  | -4.72991800 | -2.34430500 |
| C | 3.95107600  | -5.05885800 | -3.02750800 |
| C | 5.05713200  | -4.21600200 | -2.94743600 |
| C | 5.02517600  | -3.06033800 | -2.16993500 |
| C | 3.88155100  | 1.36834900  | -1.30145100 |
| C | 4.56770500  | 2.43910900  | -1.99117800 |
| C | 5.83709000  | 2.16799400  | -2.49138200 |
| C | 6.42861900  | 0.93141000  | -2.30877400 |
| C | 4.57920200  | 0.14608400  | -1.19885200 |
| C | 2.84019000  | 2.63162500  | 1.07414300  |
| C | 2.72730000  | 2.18122900  | 2.39559000  |
| C | 3.27141000  | 2.92773100  | 3.43652500  |
| C | 3.95694100  | 4.10721600  | 3.16250100  |
| C | 4.05576000  | 4.56366800  | 1.85562700  |
| C | 3.49640400  | 3.84475500  | 0.81570500  |
| C | 1.32526800  | 2.77440100  | -1.33943100 |
| C | 0.78961400  | 3.92243700  | -0.73968000 |
| C | 0.11569400  | 4.87160800  | -1.50464800 |
| C | -0.05616400 | 4.67727000  | -2.87064200 |
| C | 0.40971300  | 3.50533500  | -3.46478700 |
| C | 1.09196000  | 2.56195300  | -2.70529600 |
| H | -3.08793600 | 4.33703600  | 0.13931400  |
| H | -2.12598600 | 6.33398300  | 1.22829000  |
| H | -0.48217300 | 6.08639300  | 3.07068000  |
| H | 0.20119900  | 3.82359300  | 3.81850300  |

|   |             |             |             |
|---|-------------|-------------|-------------|
| H | -0.72377300 | 1.82299900  | 2.70864900  |
| H | -5.36831800 | 2.23633800  | 0.00576400  |
| H | -6.52910700 | 3.02705400  | -2.01405800 |
| H | -5.28816200 | 3.20518200  | -4.17355700 |
| H | -2.88988400 | 2.58009900  | -4.25698100 |
| H | -1.71056500 | 1.87000900  | -2.21347500 |
| H | -5.25968600 | -2.26842200 | 2.43025200  |
| H | -6.24842300 | -0.75988300 | 4.16972000  |
| H | -5.50209300 | 1.61546300  | 4.22534600  |
| H | -6.31743900 | -1.78399200 | -0.10994400 |
| H | -7.72050200 | -1.18947700 | -2.04062500 |
| H | -6.64642100 | -0.36807900 | -4.14768400 |
| H | -4.18108000 | -0.27435200 | -4.30833700 |
| H | -2.78458300 | -1.04799600 | -2.44614100 |
| H | -5.40647600 | -3.88872300 | -0.08767000 |
| H | -5.57767100 | -6.12927700 | 0.89041800  |
| H | -3.79171900 | -6.98986000 | 2.39936000  |
| H | -1.80674000 | -5.58848100 | 2.87522500  |
| H | -1.63393100 | -3.31616200 | 1.90401200  |
| H | 3.05439400  | -1.30685100 | 2.46950200  |
| H | 4.34823900  | -1.86684100 | 4.50363700  |
| H | 6.71395800  | -2.55998300 | 4.31224600  |
| H | 7.78323100  | -2.72964600 | 2.08850000  |
| H | 6.50805700  | -2.13894700 | 0.04589900  |
| H | 1.81207100  | -3.27536000 | -1.11713700 |
| H | 1.90125100  | -5.35525700 | -2.42680700 |
| H | 3.99018100  | -5.95403700 | -3.64139900 |
| H | 5.94547700  | -4.45097000 | -3.52318200 |
| H | 5.86927200  | -2.37849400 | -2.15159600 |
| H | 4.06805800  | 3.37568900  | -2.21150900 |
| H | 6.36851200  | 2.93012000  | -3.05502300 |
| H | 7.41064900  | 0.70752100  | -2.70813400 |
| H | 2.21120500  | 1.24949400  | 2.60599100  |
| H | 3.16846000  | 2.59857100  | 4.46413700  |
| H | 4.46043800  | 4.65419500  | 3.94986600  |
| H | 4.59743600  | 5.46830400  | 1.63651100  |
| H | 3.58459100  | 4.21068000  | -0.19958400 |
| H | 0.91412100  | 4.09469200  | 0.32426000  |
| H | -0.26817700 | 5.76565500  | -1.02354300 |
| H | -0.55672100 | 5.43429600  | -3.46661000 |
| H | 0.25088500  | 3.32702000  | -4.52383600 |
| H | 1.43440000  | 1.65149300  | -3.17670300 |

**T<sub>1</sub> (2)**

|    |             |             |             |
|----|-------------|-------------|-------------|
| I  | 0.19097100  | -0.91239200 | 2.23890700  |
| I  | 0.05093400  | -1.07294800 | -2.10059000 |
| Cu | -1.34349700 | -0.50681500 | 0.04978300  |
| Cu | 1.59963600  | -0.48805700 | 0.02020100  |
| P  | -2.53354100 | 1.41220200  | 0.49804000  |
| P  | -3.31220000 | -1.72423900 | 0.24623200  |
| P  | 3.74396000  | -1.25534700 | -0.37124600 |
| P  | 2.39576300  | 1.63200500  | -0.37783000 |
| N  | -4.29875800 | 1.46176200  | 2.58730200  |
| N  | 5.79674300  | -0.07604400 | -1.65600700 |
| C  | -1.98381700 | 2.92809900  | 1.36633100  |
| C  | -2.37849300 | 4.20864000  | 0.96614800  |
| C  | -1.83881600 | 5.33279400  | 1.58809200  |
| C  | -0.91556000 | 5.19242900  | 2.62079800  |
| C  | -0.53252400 | 3.91950900  | 3.03675100  |
| C  | -1.05779600 | 2.79479100  | 2.40842100  |
| C  | -3.46461800 | 2.02078700  | -0.94976500 |
| C  | -4.82271900 | 2.34439700  | -0.91125500 |
| C  | -5.47678200 | 2.79086900  | -2.05517200 |
| C  | -4.78176600 | 2.89829600  | -3.25704500 |
| C  | -3.43188000 | 2.55995800  | -3.30477300 |
| C  | -2.76945100 | 2.13499300  | -2.15859700 |
| C  | -4.11630200 | -0.69735500 | 1.53444500  |
| C  | -5.01567600 | -1.22450300 | 2.45827300  |
| C  | -5.54768000 | -0.40140300 | 3.43827200  |
| C  | -5.14270900 | 0.92643700  | 3.46602600  |
| C  | -3.79596100 | 0.67496600  | 1.63666300  |
| C  | -4.45368800 | -1.48735900 | -1.16134300 |
| C  | -5.85047100 | -1.51244900 | -1.05530700 |
| C  | -6.64375400 | -1.14532100 | -2.13747400 |
| C  | -6.04865800 | -0.69859300 | -3.31647900 |
| C  | -4.66395300 | -0.65933400 | -3.42132800 |
| C  | -3.87069200 | -1.08055900 | -2.36269700 |
| C  | -3.52923800 | -3.43485300 | 0.86025700  |
| C  | -4.63438600 | -4.24258300 | 0.56723100  |
| C  | -4.72876500 | -5.52086000 | 1.11188100  |
| C  | -3.72287800 | -6.01002900 | 1.94237900  |
| C  | -2.60899200 | -5.22181400 | 2.21913300  |
| C  | -2.51108000 | -3.94286300 | 1.67785400  |
| C  | 4.71956200  | -1.68139900 | 1.11564600  |



|   |             |             |             |
|---|-------------|-------------|-------------|
| C | 4.11901300  | -1.59983700 | 2.37614700  |
| C | 4.84066500  | -1.92644600 | 3.52164200  |
| C | 6.16448700  | -2.33550000 | 3.41478300  |
| C | 6.76696200  | -2.42813500 | 2.16229200  |
| C | 6.05124000  | -2.10525200 | 1.01331900  |
| C | 3.87125900  | -2.72348400 | -1.46645200 |
| C | 2.75371300  | -3.55696300 | -1.57669500 |
| C | 2.78842400  | -4.71110300 | -2.35330700 |
| C | 3.94785700  | -5.03812900 | -3.04666300 |
| C | 5.05594600  | -4.19733200 | -2.97044700 |
| C | 5.03154600  | -3.04593700 | -2.18634100 |
| C | 3.87164400  | 1.37271300  | -1.31178400 |
| C | 4.54940900  | 2.43977500  | -2.01716000 |
| C | 5.82446500  | 2.18793300  | -2.50134600 |
| C | 6.43549100  | 0.95871800  | -2.30283100 |
| C | 4.58868200  | 0.15458200  | -1.19991600 |
| C | 2.82659500  | 2.61698300  | 1.09194000  |
| C | 2.71541500  | 2.16228800  | 2.41151500  |
| C | 3.26615000  | 2.90320300  | 3.45337100  |
| C | 3.95672600  | 4.08025700  | 3.18281000  |
| C | 4.05533900  | 4.54068500  | 1.87708500  |
| C | 3.49060200  | 3.82700900  | 0.83679400  |
| C | 1.33320500  | 2.79422800  | -1.33005200 |
| C | 0.79316500  | 3.93563100  | -0.72177500 |
| C | 0.11500000  | 4.88683100  | -1.47989100 |
| C | -0.05855400 | 4.69936600  | -2.84690200 |
| C | 0.40952600  | 3.53257700  | -3.44921100 |
| C | 1.09618400  | 2.58719100  | -2.69614500 |
| H | -3.08972000 | 4.33229300  | 0.15453800  |
| H | -2.12584000 | 6.32427700  | 1.25091100  |
| H | -0.48394400 | 6.06838400  | 3.09382900  |
| H | 0.19562500  | 3.80210800  | 3.83468000  |
| H | -0.73109200 | 1.80640300  | 2.71696300  |
| H | -5.37237500 | 2.23632300  | 0.01503900  |
| H | -6.53159500 | 3.03821800  | -2.00114600 |
| H | -5.29025300 | 3.22385900  | -4.15987900 |
| H | -2.89352600 | 2.59357800  | -4.24630800 |
| H | -1.71608100 | 1.86983000  | -2.20612200 |
| H | -5.26662700 | -2.28097600 | 2.42215400  |
| H | -6.25321300 | -0.77910200 | 4.16862400  |
| H | -5.50457800 | 1.59517300  | 4.23435300  |
| H | -6.32386300 | -1.78453600 | -0.11656600 |

|   |             |             |             |
|---|-------------|-------------|-------------|
| H | -7.72588000 | -1.18026000 | -2.04510700 |
| H | -6.65057500 | -0.35213100 | -4.14862200 |
| H | -4.18475700 | -0.26071200 | -4.30843500 |
| H | -2.78939700 | -1.04314000 | -2.44877500 |
| H | -5.41444900 | -3.89079600 | -0.10122300 |
| H | -5.58595000 | -6.13575200 | 0.86704900  |
| H | -3.79968600 | -7.00312300 | 2.37191700  |
| H | -1.81439100 | -5.60430800 | 2.85332800  |
| H | -1.64077400 | -3.32784900 | 1.89095600  |
| H | 3.08102900  | -1.29310200 | 2.46232900  |
| H | 4.36652000  | -1.87236000 | 4.49747000  |
| H | 6.72341700  | -2.59109400 | 4.30698100  |
| H | 7.79356700  | -2.77031100 | 2.08425300  |
| H | 6.52533800  | -2.16745600 | 0.04073400  |
| H | 1.82625500  | -3.25977400 | -1.11171000 |
| H | 1.90207400  | -5.33472300 | -2.43265900 |
| H | 3.98117800  | -5.92999100 | -3.66579800 |
| H | 5.93904700  | -4.43083700 | -3.55469300 |
| H | 5.87827700  | -2.36720700 | -2.17009700 |
| H | 4.04358800  | 3.37401000  | -2.23535200 |
| H | 6.34840900  | 2.95418400  | -3.06600400 |
| H | 7.42463600  | 0.74552800  | -2.68964900 |
| H | 2.19528900  | 1.23247000  | 2.62028100  |
| H | 3.16372800  | 2.57096400  | 4.48007500  |
| H | 4.46510800  | 4.62136700  | 3.97108300  |
| H | 4.60111500  | 5.44327300  | 1.65874000  |
| H | 3.58065400  | 4.19554700  | -0.17783600 |
| H | 0.91734500  | 4.10056900  | 0.34337300  |
| H | -0.27206500 | 5.77635000  | -0.99315900 |
| H | -0.56480600 | 5.45724600  | -3.43693400 |
| H | 0.24662500  | 3.35896700  | -4.50838800 |
| H | 1.43832900  | 1.67831400  | -3.17149100 |
